# Supplementary material for: Topographical Analysis of Aneurysm Wall Enhancement With 3‐Dimensional Mapping
Source: PubMed Central journal article supplement — Stroke Vasc Interv Neurol. 2022 May 9;2(4):e000309. doi: 10.1161/SVIN.121.000309 (PMC9432773; doi:10.1161/svin.121.000309), 2022-05-09
Supplement: NIHMS1785737-supplement-supinfo.pdf [file NIHMS1785737-supplement-supinfo.pdf]

## SUPPLEMENTAL MATERIALS

### *Topographical Analysis of Aneurysm Wall Enhancement with 3D Mapping*

**Authors:** Ashrita Raghuram BSE<sup>1</sup>, Alberto Varon MD<sup>1</sup>, Sebastian Sanchez MD<sup>1</sup>, Daizo Ishii MD<sup>2</sup>, Chaorong Wu PhD<sup>3</sup>, Vincent A Magnotta PhD<sup>4</sup>, David M. Hasan MD<sup>6</sup>, Timothy R. Koscik PhD<sup>5</sup>, Edgar A. Samaniego MD, MS<sup>1,2,4</sup>

**Affiliations:**

1. Department of Neurology, University of Iowa Carver College of Medicine, Iowa City, IA.
2. Department of Neurosurgery, University of Iowa Carver College of Medicine, Iowa City, IA.
3. Institute for Clinical and Translational Science, University of Iowa, Iowa City, IA.
4. Department of Radiology, University of Iowa Carver College of Medicine, Iowa City, IA.
5. Department of Psychiatry, University of Iowa Carver College of Medicine, Iowa City, IA.
6. Department of Neurosurgery, Duke University, Durham, NC

**Corresponding Author:**

Edgar A Samaniego MD, MS

Associate Professor of Neurology, Neurosurgery and Radiology

200 Hawkins Drive, Iowa City, Iowa 52246

United States of America

319-333-4460

Email: [edgarsama@gmail.com](mailto:edgarsama@gmail.com)

**Supplementary Table S1.** Technical parameters for HR-VWI acquisition in a 7T GE MR950 MRI Scanner.

| Parameter            | Image Sequence |           |                   |
|----------------------|----------------|-----------|-------------------|
|                      | T1 CUBE        | T2 CUBE   | 3D TOF            |
| TR (msec)            | 700            | 2500      | 40                |
| TE (msec)            | 10.3 (minimum) | 71.84     | 2.3               |
| Flip angle           | 90             | 90        | 12                |
| Bandwidth (Hz/pixel) | 62.5           | 62.5      | 62.5              |
| FOV (mm)             | 180 x 180      | 256 x 256 | 220x220           |
| Matrix (mm)          | 384 x 384      | 256 x 256 | 512x512           |
| Voxel size (mm)      | 0.5 x 0.5 x 1  | 1 x 1 x 1 | 0.43 x 0.43 x 1.0 |
| Slice thickness (mm) | 0.5            | 1.0       | 1.0               |
| ETL                  | 22             | 100       | 1                 |

CE-MRA: contrast-enhanced MRA; ETL: echo train length; FOV: field of view; TE: echo time; TR: response time.

**Supplementary Table S2.** Demographic and location data for all aneurysms in cohort.

| <b>Location</b> | <b>Shape</b> | <b>Size (mm)</b> | <b>Size Ratio</b> | <b>Aspect Ratio</b> | <b>Sex</b> | <b>Age</b> | <b>HTN</b> | <b>HLD</b> |
|-----------------|--------------|------------------|-------------------|---------------------|------------|------------|------------|------------|
| PICA            | Saccular*    | 3.8              | 1.24              | 1.75                | F          | 82         | Y          | N          |
| ACOM            | Saccular     | 5.9              | 1.68              | 1.29                | M          | 57         | N          | N          |
| ACOM            | Saccular*    | 3.2              | 1.25              | 2.00                | M          | 77         | N          | N          |
| ICA             | Saccular*    | 16.7             | 7.52              | 6.35                | F          | 61         | N          | N          |
| ACOM            | Saccular     | 6.4              | 2.89              | 1.16                | M          | 77         | Y          | Y          |
| ACOM            | Saccular     | 4.4              | 1.65              | 1.07                | M          | 71         | Y          | Y          |
| BA              | Saccular     | 3.8              | 1.87              | 1.67                | F          | 69         | Y          | Y          |
| ICA             | Saccular*    | 3.9              | 1.09              | 1.44                | F          | 63         | Y          | N          |
| PCOM            | Saccular     | 16.8             | 3.57              | 5.29                | F          | 69         | Y          | Y          |
| ICA             | Saccular     | 5.9              | 0.68              | 0.95                | F          | 73         | Y          | Y          |
| ICA             | Saccular     | 4.1              | 0.69              | 1.06                | F          | 76         | Y          | N          |
| ICA             | Saccular     | 2.8              | 0.72              | 1.27                | F          | 64         | N          | N          |
| BA              | Saccular     | 4.8              | 2.61              | 1.09                | F          | 64         | N          | N          |
| ICA             | Saccular     | 5.9              | 1.05              | 0.93                | F          | 71         | N          | Y          |
| ICA             | Saccular     | 10.2             | 3.27              | 2.87                | F          | 61         | N          | N          |
| MCA             | Saccular     | 3.5              | 1.11              | 1.27                | F          | 79         | Y          | Y          |
| MCA             | Saccular     | 7.8              | 3.52              | 0.91                | M          | 68         | Y          | Y          |
| ICA             | Saccular     | 3.6              | 0.85              | 1.03                | F          | 63         | N          | Y          |
| ACOM            | Saccular     | 8.2              | 3.78              | 2.32                | M          | 61         | Y          | Y          |
| BA              | Saccular     | 13.1             | 6.48              | 6.24                | F          | 60         | Y          | N          |
| MCA             | Saccular     | 7.0              | 2.16              | 0.69                | M          | 51         | Y          | N          |
| ACOM            | Saccular     | 5.3              | 1.37              | 1.60                | F          | 62         | Y          | N          |
| MCA             | Saccular     | 7.1              | 2.46              | 2.37                | M          | 58         | Y          | N          |
| ACA             | Saccular     | 7.7              | 3.29              | 2.31                | F          | 74         | Y          | Y          |
| BA              | Fusiform     | 11.3             | N/A               | N/A                 | F          | 68         | Y          | Y          |
| BA              | Fusiform     | 11.3             | N/A               | N/A                 | F          | 68         | Y          | Y          |
| ICA             | Fusiform     | 5.3              | N/A               | N/A                 | M          | 62         | N          | N          |
| BA              | Fusiform*    | 27.0             | N/A               | N/A                 | M          | 59         | Y          | Y          |
| ICA             | Fusiform     | 25.8             | N/A               | N/A                 | F          | 79         | Y          | Y          |
| ICA             | Fusiform     | 5.9              | N/A               | N/A                 | F          | 49         | N          | N          |
| ICA             | Fusiform     | 6.7              | N/A               | N/A                 | F          | 49         | N          | N          |
| ICA             | Fusiform*    | 29.3             | N/A               | N/A                 | F          | 60         | Y          | Y          |

\*Indicates presence of intramural thrombosis
